# Supplementary material
Source: PubMed Central journal article supplement (PMC3554395)

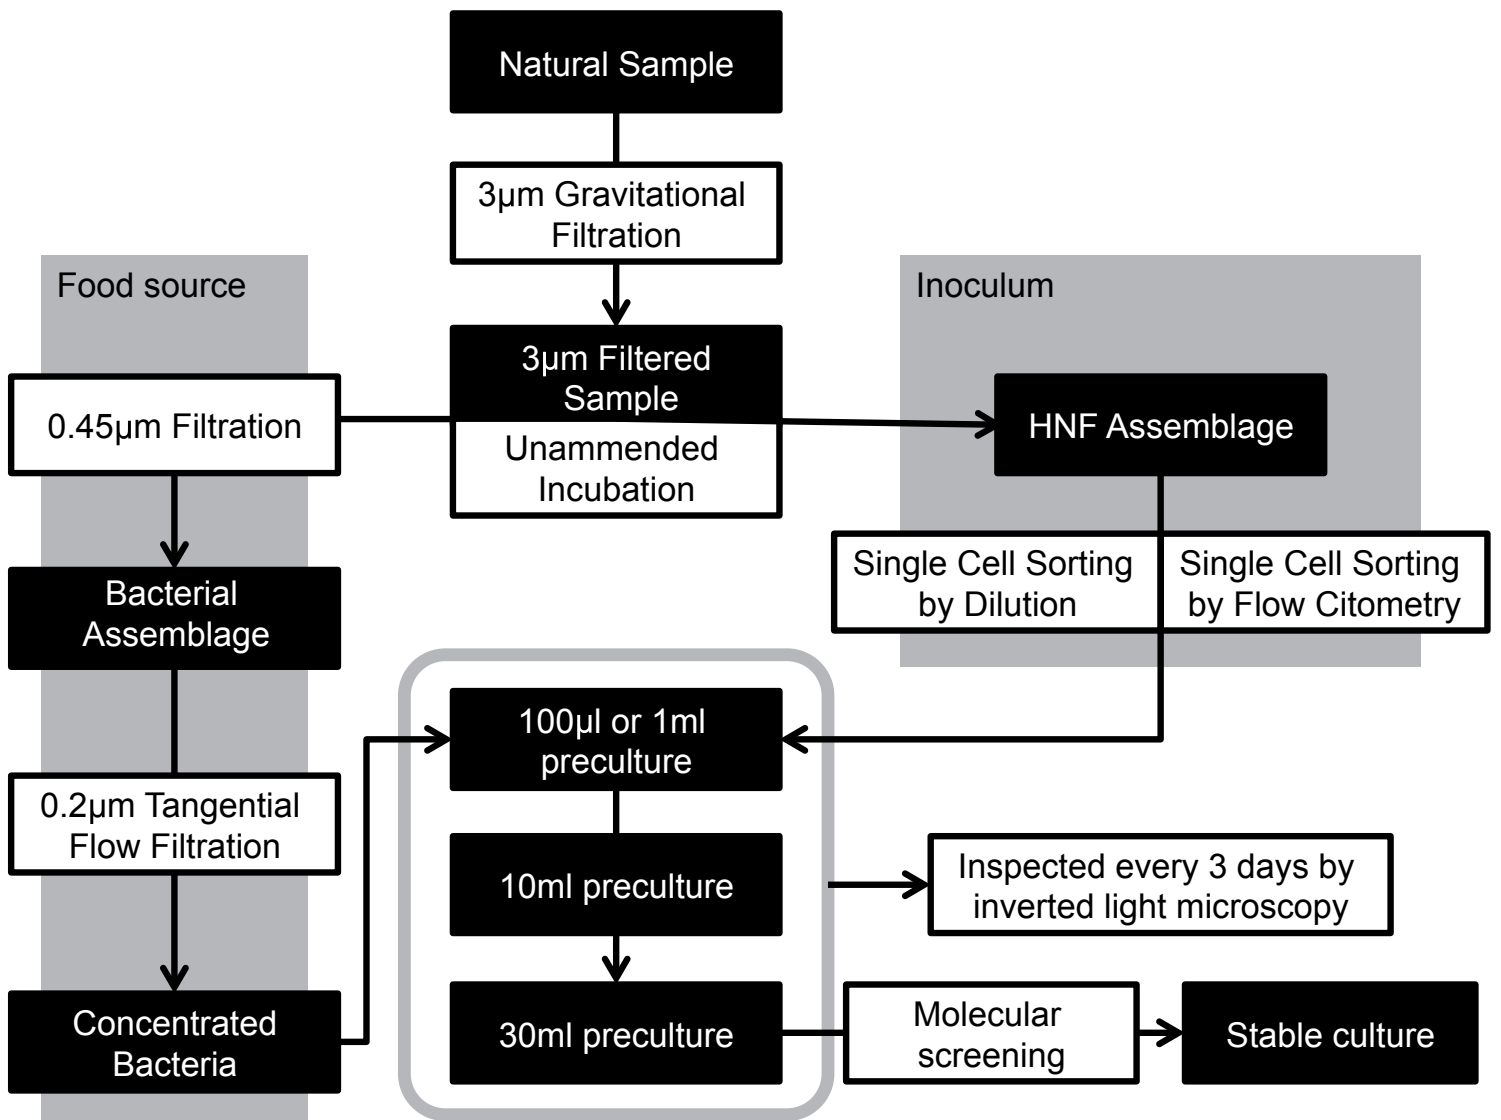

Supplement: ismej201285x1.pdf [file ismej201285x1.pdf]

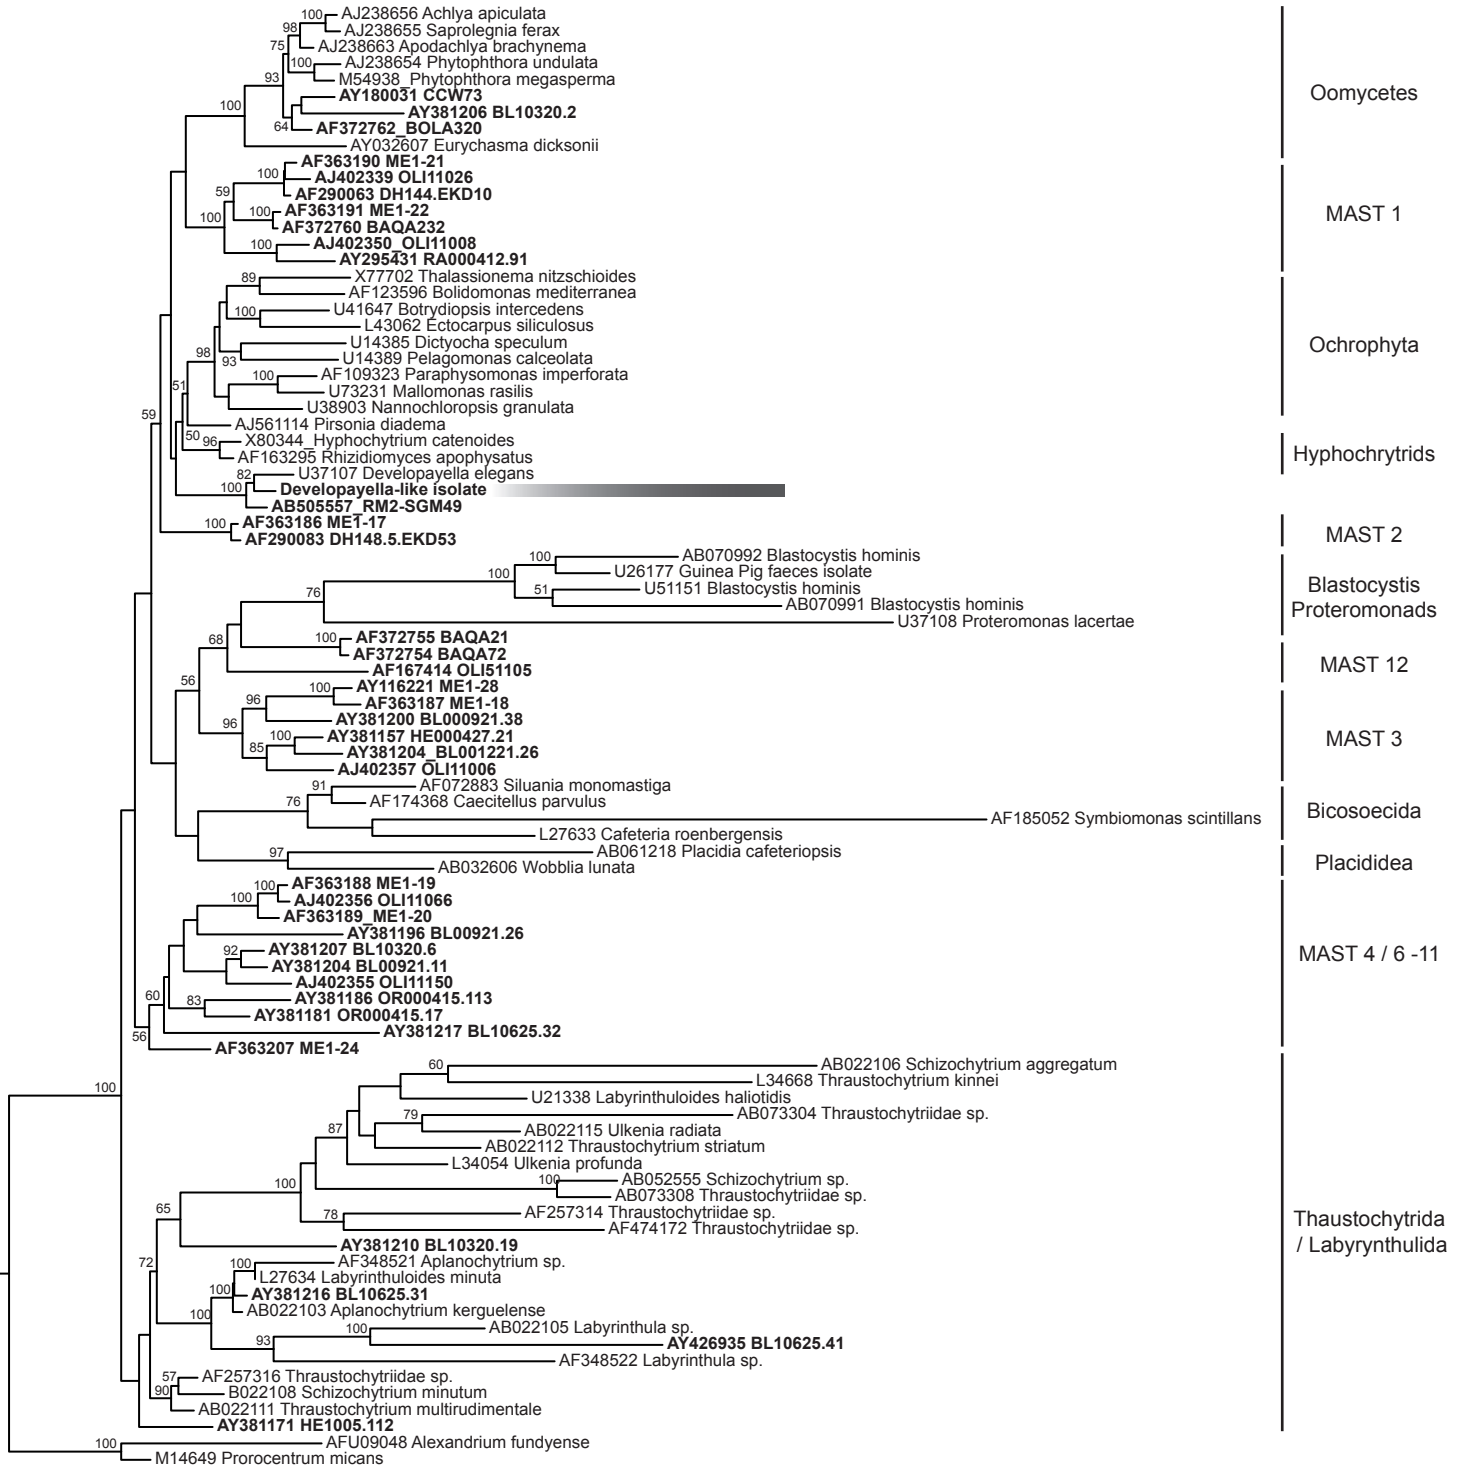

Supplement: ismej201285x2.pdf [file ismej201285x2.pdf]

*Minorisa minuta* candidatus isolate

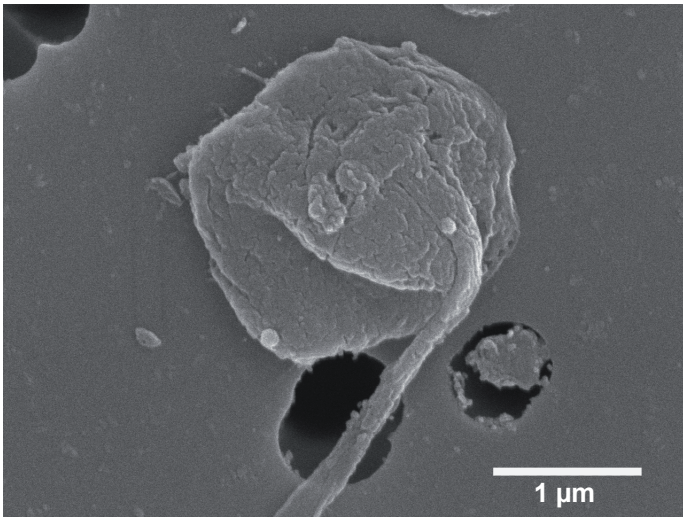

*Developayella*-like isolate

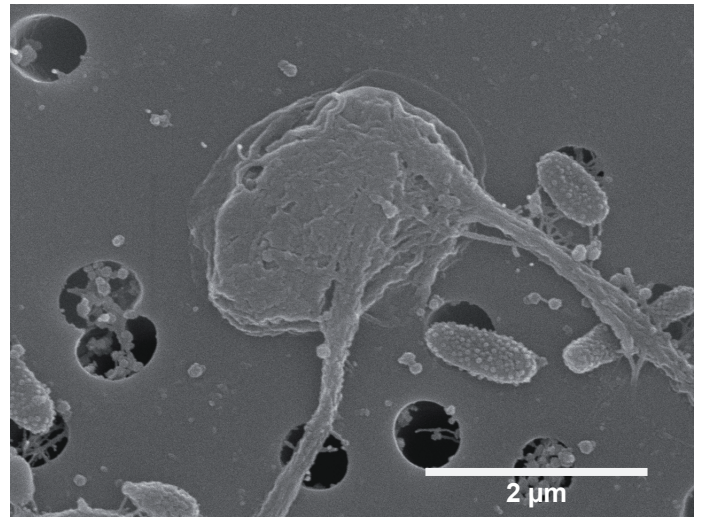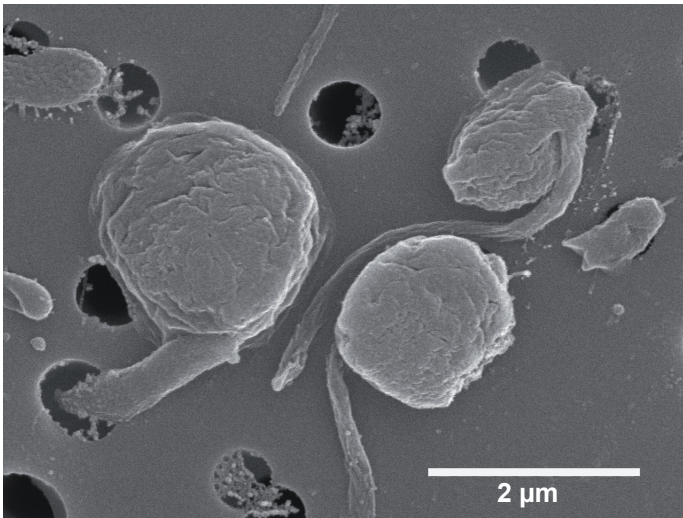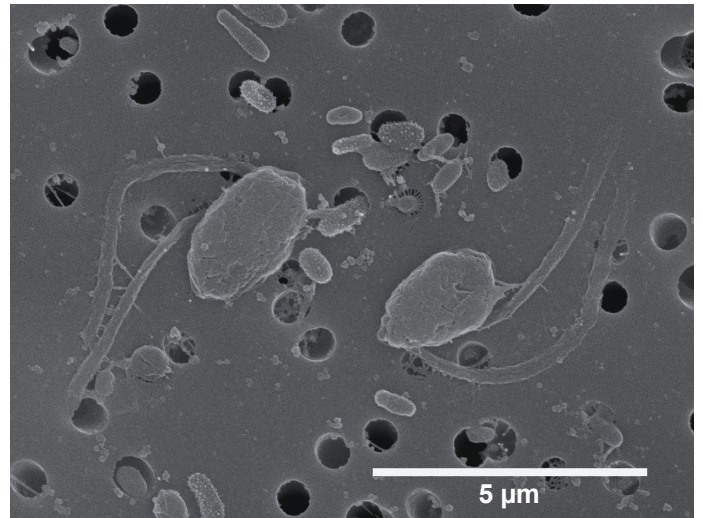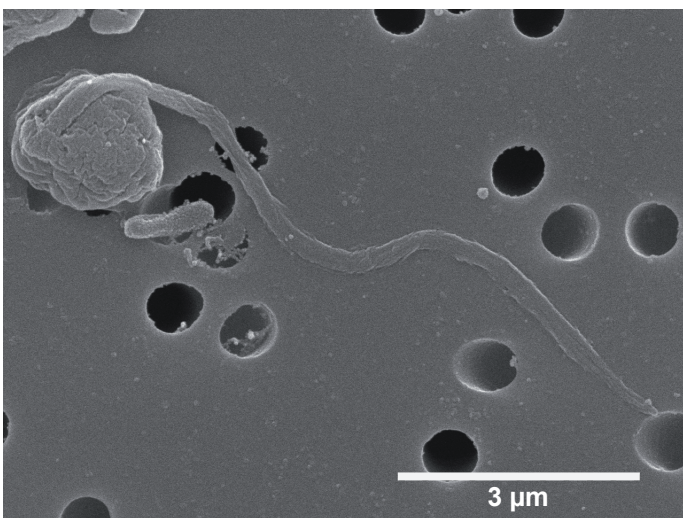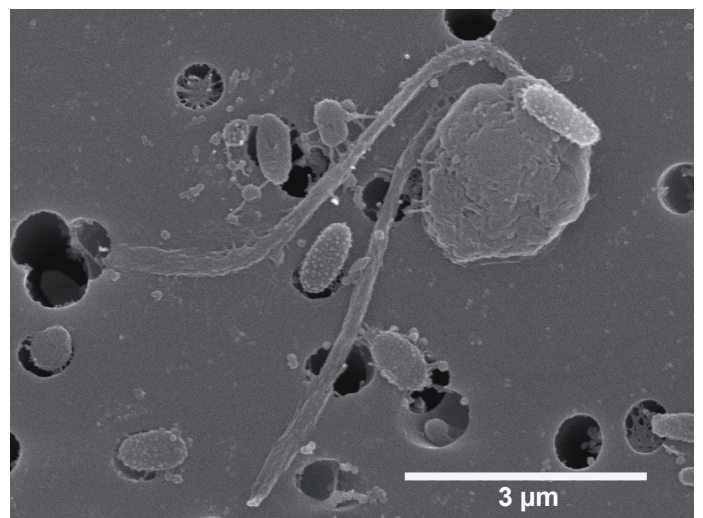

Supplement: ismej201285x3.pdf [file ismej201285x3.pdf]
